# Supplementary material for: Carbon-encapsulated tungsten oxide nanowires as a stable and high-rate anode material for flexible asymmetric supercapacitors
Source: Royal Society of Chemistry journal article supplement (doi:10.1039/c6ta08274b), 2016-11-01
Supplement: c6ta08274b1.pdf [file c6ta08274b1.pdf]

## Supporting Information

### **Carbon-Encapsulated Tungsten Oxide Nanowires as Stable and High-Rate Anode for Flexible Asymmetric Supercapacitors**

Chenzhong Yao,<sup>a\*</sup> Bohui Wei,<sup>a</sup> Hui Li,<sup>a</sup> Gaofeng Wang,<sup>a</sup> Qiuping Han,<sup>a</sup> Huixuan Ma,<sup>a</sup> and Qiaojuan Gong<sup>a\*</sup>

<sup>a</sup>Department of Applied Chemistry, Yuncheng University, Yuncheng 044000, PR China, \*E-mail: yaochzh1999@126.com (C. Yao); gqjuan@163.com (Q Gong).

#### **Experimental Section**

**Preparation of carbon encapsulated  $WO_{3-x}$  ( $C@WO_{3-x}$ ) nanowires:** All reagents used were of analytical grade and were used directly without any purification. Vertical  $WO_3$  nanowires were directly prepared on carbon cloth by a seed-assisted hydrothermal method. Carbon cloth (2 cm × 3 cm) was firstly cleaned with ethanol and distilled water, followed by being immersed in a solution of containing 0.695 g  $Na_2WO_4 \cdot 2H_2O$ , 10 mL 3 M HCl and 2 mL  $H_2O_2$  (30vol% aqueous solution) for 10 min. Then, the carbon cloth was annealed on a hotplate in air at 300 °C for 10 min to form  $WO_3$  seed on the carbon cloth. Subsequently, 1.33 g  $H_2WO_4$  and 0.028 g  $CH_3COONH_4$  were dissolved in a mixed solution of 26 mL distilled water and 6 mL  $H_2O_2$  (30vol% aqueous solution), and stirred into a pellucid solution. 20 mL of this clear solution mixture together with the carbon cloth coated with  $WO_3$  seed was transferred to a Teflon-lined stainless steel autoclave (25 mL volume). The sealed autoclave was heated in an electric oven at 180 °C for 12 h, and then allows it cool down slowly at room temperature. After thoroughly

washed with DI water and dried, uniform  $\text{WO}_3$  film was obtained on the surface of carbon cloth. Finally,  $\text{C@WO}_{3-x}$  nanowires were obtained by a glucose-assisted hydrothermal method in a 0.1 M glucose solution at 180 °C for 6 h and then was annealed at 800 °C in  $\text{N}_2$  for 1 h. To prepare pristine  $\text{WO}_3$  nanowires, the as-prepared  $\text{WO}_3$  nanowires were also was

***Preparation of TiN/MnO<sub>2</sub> electrode:*** TiN nanowires were firstly prepared on carbon cloth according to the previous literature.<sup>1</sup> Then, amorphous  $\text{MnO}_2$  layer was electrodeposited onto the surface of the TiN nanowires by using a CHI 760D workstation. The electrodeposition was performed in an electrolyte containing a containing 0.1 M manganese acetate and 0.1 M sodium sulphate at 0.8 V for 60s at room temperature.

***Fabrication of flexible solid-state asymmetric Supercapacitors (ASCs):*** The solid-state  $\text{TiN/MnO}_2/\text{C@WO}_{3-x}$ -ASCs were fabricated by separating  $\text{TiN/MnO}_2$  and  $\text{C@WO}_{3-x}$  electrodes with a NKK separator (Nippon Kodoshi Corporation) and polyvinyl alcohol (PVA)/LiCl gel as the electrolyte. To optimize the charge between the electrodes, the area ratio of  $\text{TiN/MnO}_2$  electrode to  $\text{C@WO}_{3-x}$  electrode was calculated to be about 1.03:1. The PVA/LiCl gel was prepared via a solution-casting method. Typically, 2.00 g PVA and 4.24 g LiCl were dissolved in distilled water (20 mL), then the solution was heated at 85 °C under vigorous stirring until they completely dissolved in water and formed a jelly-like solution. Two electrodes and separator were soaked in the PVA/LiCl solution, and then the gel was allowed solidify at room

temperature for 6 h. Then, they were assembled together and kept at 40 °C for 6 h to remove excess water in the electrolyte.

**Characterization:** The morphology, microstructure and composition of the as-prepared samples were characterized by field-emission SEM (FE-SEM, JSM-6330F), transmission electron microscopy (TEM, FEI Tecnai G<sup>2</sup> F30), XPS (XPS, ESCALab250, Thermo VG) and X-ray diffractometer (XRD, D8 ADVANCE). Electrochemical measurements such as cyclic voltammetry (CV) and galvanostatic charge/discharge measurements were performed on an electrochemical workstation (CHI 760D). The electrochemical studies of the individual electrode were carried out in a conventional three-electrode cell, with a graphite electrode, a saturated calomel reference electrode (SCE) and 5 M LiCl electrolyte.

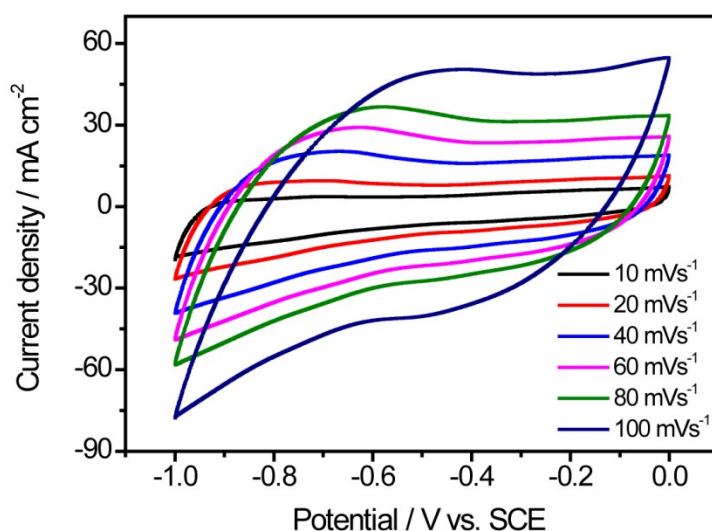

**Figure S1.** CV curves of the C@WO<sub>3-x</sub> electrode collected at various scan rates.

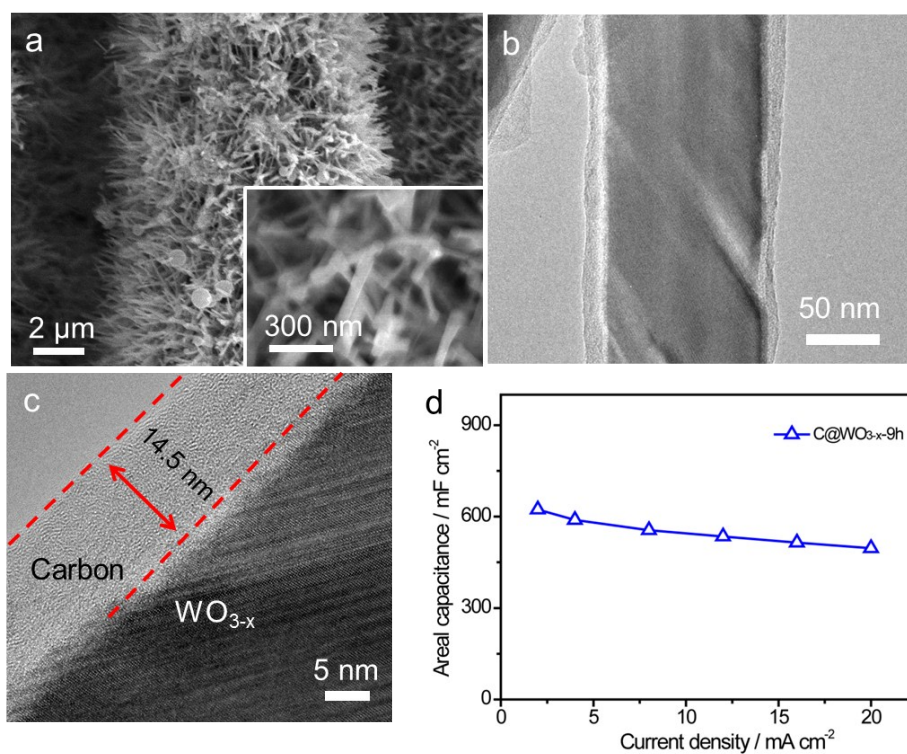

**Figure S2.** (a) SEM images, (b) TEM, (c) HRTEM images and (d) areal capacitances as a function of current density of the C@WO<sub>3-x</sub> nanowires nanowires obtained with a hydrothermal time of 9 h.

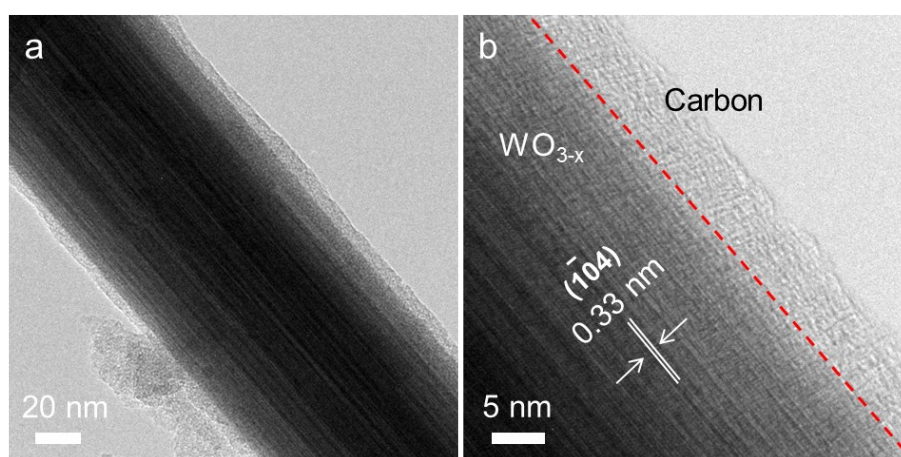

**Figure S3.** (a) TEM and (b) HRTEM images of t the C@WO<sub>3-x</sub> electrode after 10000 cycles

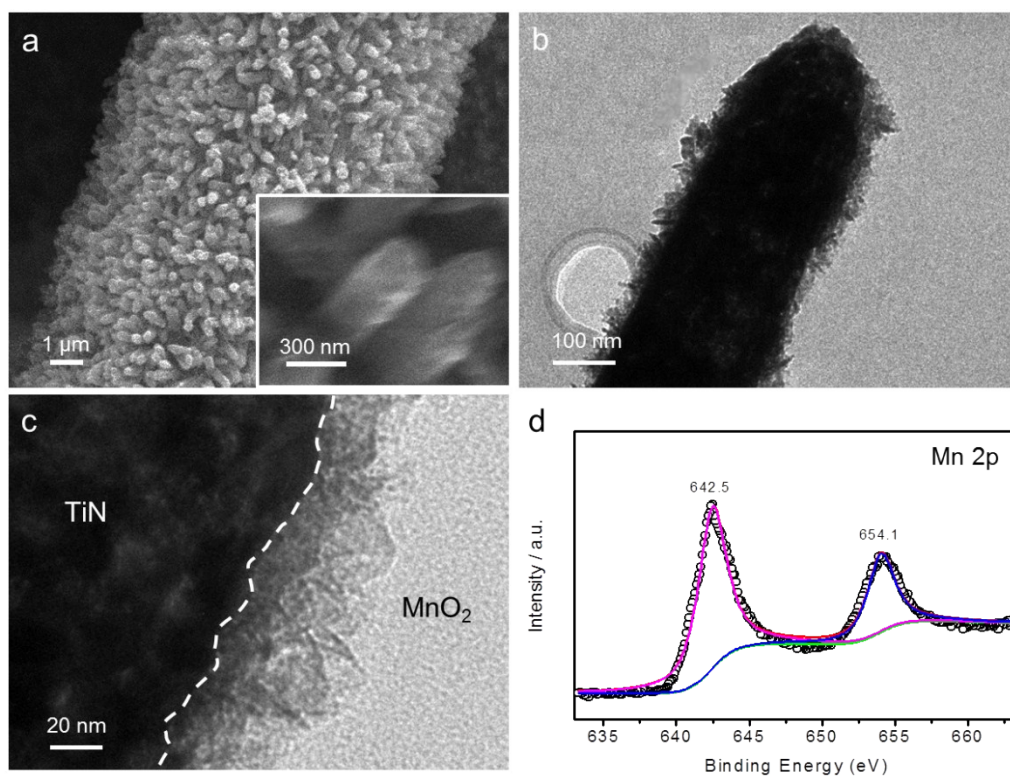

**Figure S4.** (a) SEM image, (b,c) TEM image, and (d) Mn 2p XPS core level spectrum of the TiN/MnO<sub>2</sub> nanowires.

1. X. Lu, G. Wang, T. Zhai, M. Yu, S. Xie, Y. Ling, C. Liang, Y. Tong and Y. Li, *Nano letters*, 2012, **12**, 5376-5381.

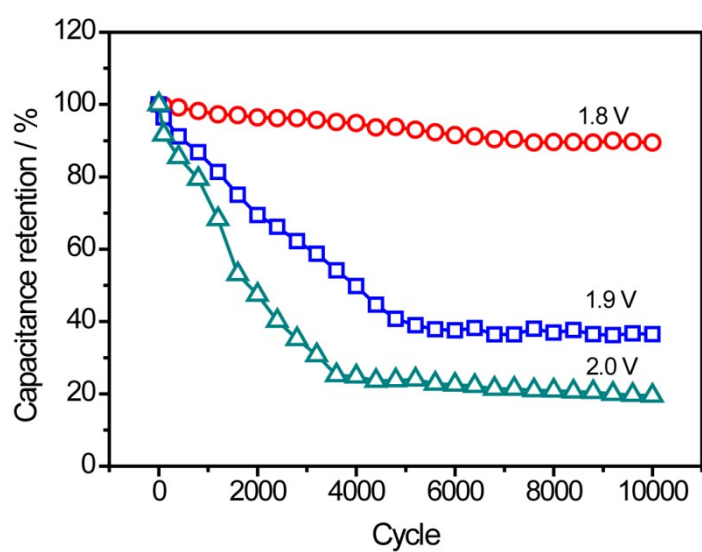

**Figure S5.** Cycling performance of the the TiN/MnO<sub>2</sub>//C@WO<sub>3-x</sub>-ASC device collected at 100 mV s<sup>-1</sup> for 10000 cycles in the potential windows of 1.8 V, 1.9 V and 2.0 V.
